# Supplementary material for: Mutant NPM1-regulated lncRNA HOTAIRM1 promotes leukemia cell autophagy and proliferation by targeting EGR1 and ULK3
Source: PubMed Central journal article supplement (PMC8493742; doi:10.1186/s13046-021-02122-2), 2021-10-06

**Additional file 7: Figure S2.** The expression levels of HOTAIRM1 in the nucleus and cytoplasm of leukemia cells were measured by qRT-PCR

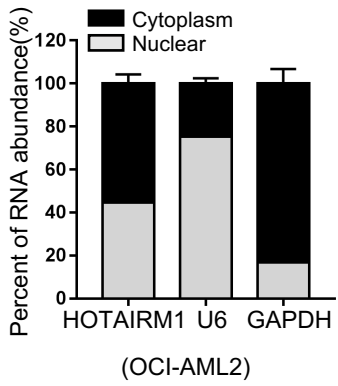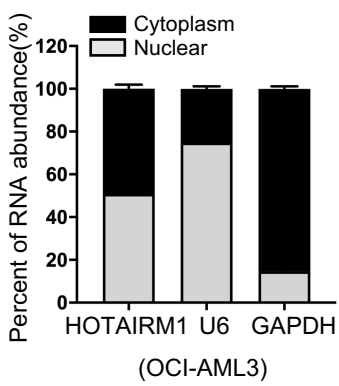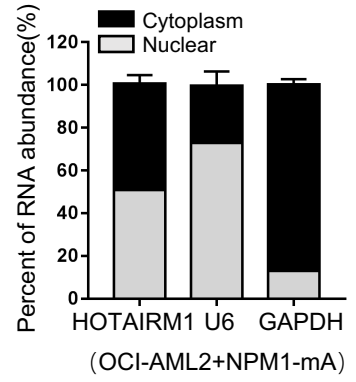

Supplement: 13046_2021_2122_MOESM7_ESM.pdf [file 13046_2021_2122_MOESM7_ESM.pdf]
