# Supplementary material for: Mutant NPM1-regulated lncRNA HOTAIRM1 promotes leukemia cell autophagy and proliferation by targeting EGR1 and ULK3
Source: PubMed Central journal article supplement (PMC8493742; doi:10.1186/s13046-021-02122-2), 2021-10-06

a

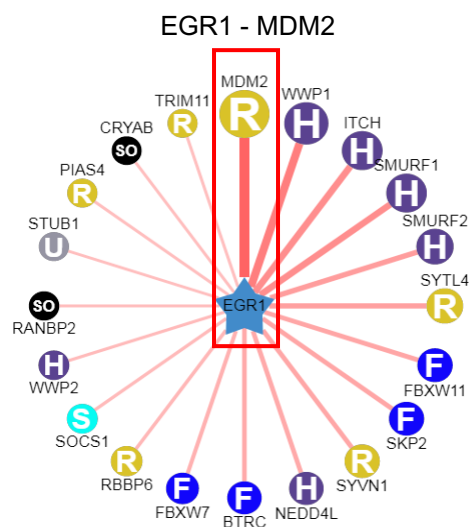

b

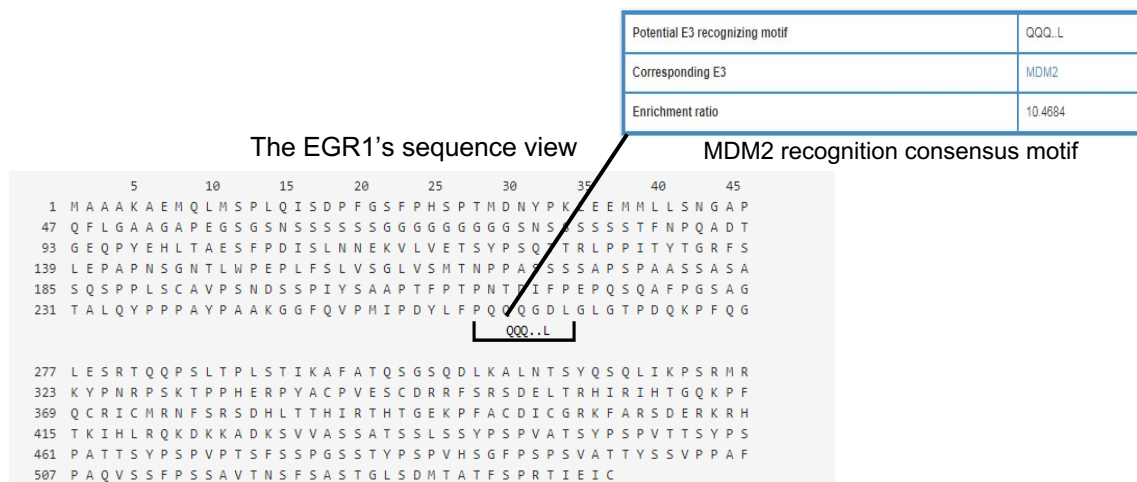

Supplement: 13046_2021_2122_MOESM17_ESM.pdf [file 13046_2021_2122_MOESM17_ESM.pdf]
