# Supplementary material for: Mutant NPM1-regulated lncRNA HOTAIRM1 promotes leukemia cell autophagy and proliferation by targeting EGR1 and ULK3
Source: Springer Nature journal article supplement (doi:10.1186/s13046-021-02122-2), 2021-10-06

**Additional file 10: Figure S5.** Enrichment of KLF5 on the E2 fragment of the HOTAIRM1 promoter was measured by ChIP assays in leukemia cells

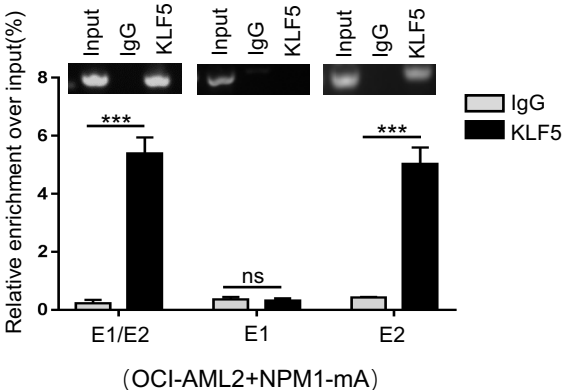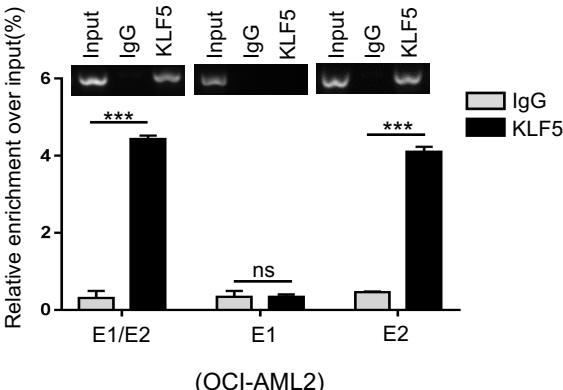

Supplement: MOESM10 [file 19734260]
