# Supplementary material for: Mutant NPM1-regulated lncRNA HOTAIRM1 promotes leukemia cell autophagy and proliferation by targeting EGR1 and ULK3
Source: Springer Nature journal article supplement (doi:10.1186/s13046-021-02122-2), 2021-10-06

**Additional file 11: Figure S6.** Co-IP assays were used to evaluate the binding of NPM1 and KLF5, NPM1-wt and WWP1 in OCI-AML3 cells

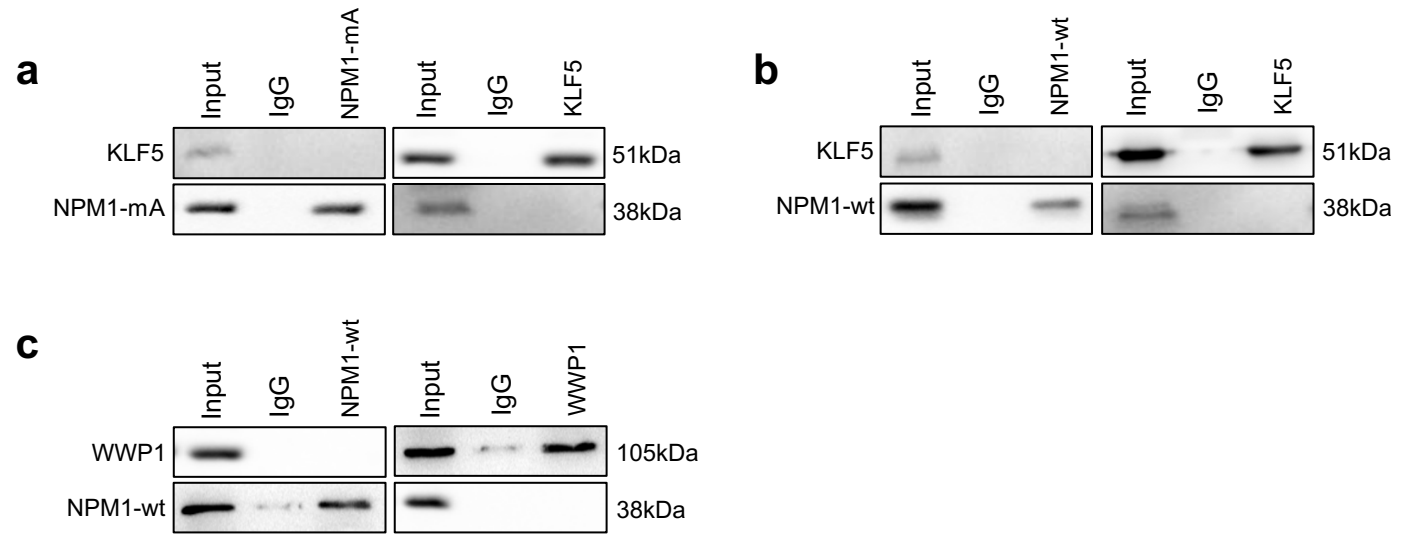

Supplement: MOESM11 [file 19734260]
