# Supplementary material for: Mutant NPM1-regulated lncRNA HOTAIRM1 promotes leukemia cell autophagy and proliferation by targeting EGR1 and ULK3
Source: Springer Nature journal article supplement (doi:10.1186/s13046-021-02122-2), 2021-10-06

**Additional file 20: Figure S15. Cytoplasmic HOTAIRM1 promotes cell cycle progression and inhibits apoptosis in leukemia cells through ULK3**

**a**

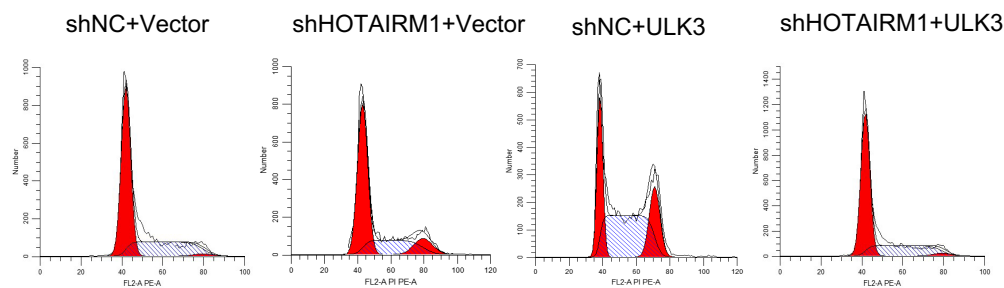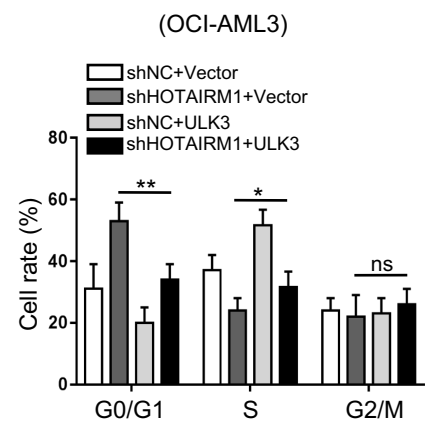

**b**

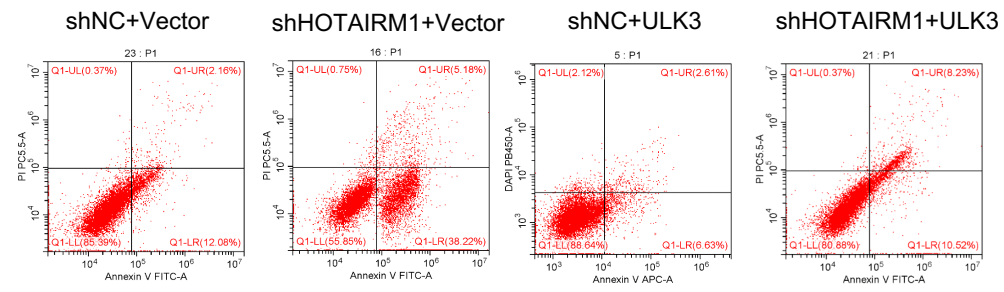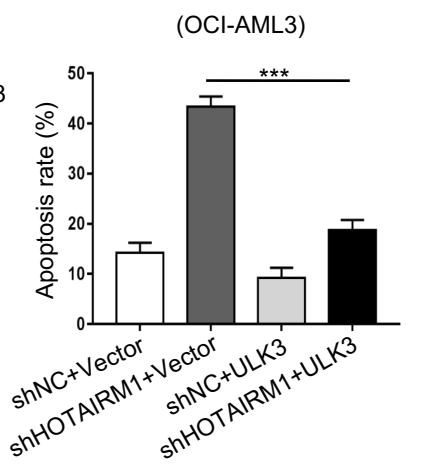

**c**

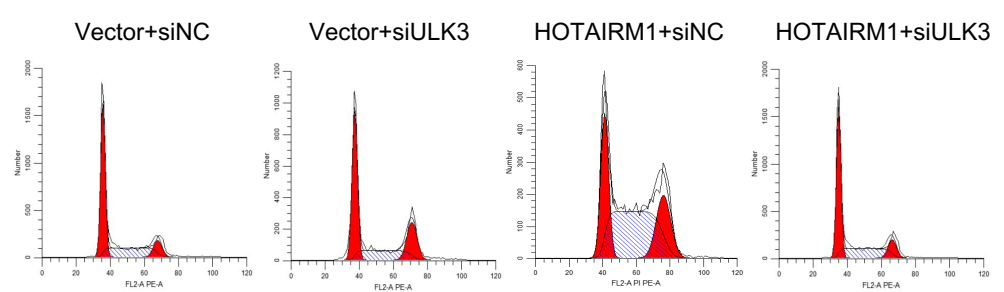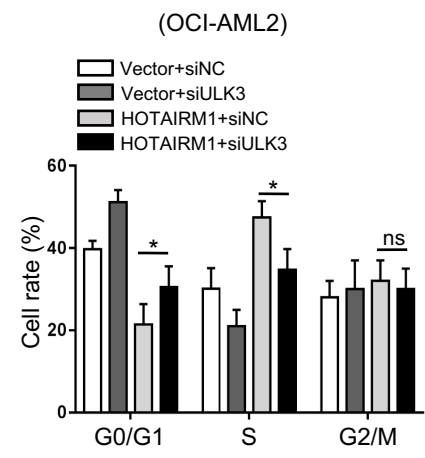

**d**

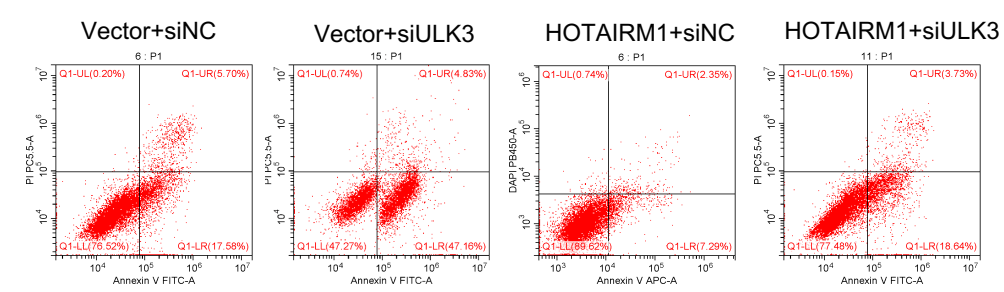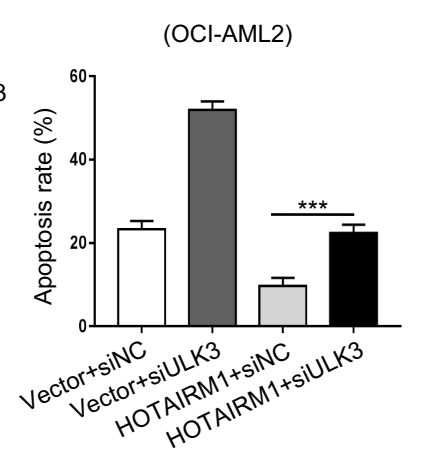

Supplement: MOESM20 [file 19734260]
